# Supplementary material for: First-in-Class Isonipecotamide-Based Thrombin and Cholinesterase Dual Inhibitors with Potential for Alzheimer Disease
Source: MDPI journal article supplement (doi:10.3390/molecules26175208), 2021-08-27

# First-in-class isonipecotamide-based thrombin and cholinesterase dual inhibitors with potential for Alzheimer disease

Rosa Purgatorio,<sup>¶</sup> Nicola Gambacorta,<sup>¶</sup> Modesto de Candia,\* Marco Catto, Mariagrazia Rullo, Leonardo Pisani, Orazio Nicolotti and Cosimo D. Altomare

<sup>¶</sup> Department of Pharmacy – Pharmaceutical Sciences, University of Bari “Aldo Moro”, via Orabona 4, I-70125, Bari (Italy)

\* Correspondence: [modesto.decandia@uniba.it](mailto:modesto.decandia@uniba.it)

## Supplementary Information

|                                  |        |
|----------------------------------|--------|
| 1. MuSSeL prediction output      | pag. 2 |
| 2. Inhibition mechanism profiles | pag. 6 |
| 3. Molecular modelling           | pag. 8 |
| 4. <sup>1</sup> H NMR spectra    | pag. 9 |

## 1. EMuSSeL prediction output

## Prediction

Prediction for O=C(Nc2cccc(OCc1cccc(F)c1)c2)C4CCN(c3ccncc3)CC4

| Position | Target                                                                            | pIC50           | $\tau$ |
|----------|-----------------------------------------------------------------------------------|-----------------|--------|
| 1        | Anandamide amidohydrolase:Homo sapiens                                            | 7.04 $\pm$ 2.19 | 0.209  |
| 2        | Platelet-derived growth factor receptor beta:Homo sapiens                         | 6.68 $\pm$ 2.21 | 0.205  |
| 3        | Anandamide amidohydrolase:Rattus norvegicus                                       | 6.65 $\pm$ 2.27 | 0.194  |
| 4        | Sphingosine 1-phosphate receptor Edg-1:Homo sapiens                               | 7.60 $\pm$ 2.28 | 0.192  |
| 5        | C-C chemokine receptor type 3:Homo sapiens                                        | 7.40 $\pm$ 2.31 | 0.187  |
| 6        | Cytochrome P450 2D6:Homo sapiens                                                  | 5.44 $\pm$ 2.35 | 0.181  |
| 7        | Neuropeptide Y receptor type 5:Homo sapiens                                       | 7.69 $\pm$ 2.35 | 0.180  |
| 8        | Caspase-3:Homo sapiens                                                            | 6.12 $\pm$ 2.36 | 0.180  |
| 9        | Caspase-7:Homo sapiens                                                            | 6.87 $\pm$ 2.36 | 0.180  |
| 10       | Tyrosine-protein kinase JAK3:Homo sapiens                                         | 7.16 $\pm$ 2.36 | 0.179  |
| 11       | Platelet activating factor receptor:Homo sapiens                                  | 6.94 $\pm$ 2.37 | 0.179  |
| 12       | MAP kinase ERK2:Mus musculus                                                      | 7.33 $\pm$ 2.37 | 0.178  |
| 13       | Leukotriene A4 hydrolase:Homo sapiens                                             | 6.97 $\pm$ 2.37 | 0.178  |
| 14       | Hepatocyte growth factor receptor:Homo sapiens                                    | 7.23 $\pm$ 2.38 | 0.177  |
| 15       | Neuronal acetylcholine receptor protein alpha-7 subunit:Rattus norvegicus         | 6.50 $\pm$ 2.38 | 0.177  |
| 16       | Cytochrome P450 3A4:Homo sapiens                                                  | 5.50 $\pm$ 2.38 | 0.177  |
| 17       | Muscarinic acetylcholine receptor M4:Homo sapiens                                 | 6.14 $\pm$ 2.38 | 0.176  |
| 18       | Poly [ADP-ribose] polymerase-1:Homo sapiens                                       | 7.11 $\pm$ 2.38 | 0.176  |
| 19       | Glycine transporter 2:Homo sapiens                                                | 6.31 $\pm$ 2.39 | 0.176  |
| 20       | Melanin-concentrating hormone receptor 1:Homo sapiens                             | 7.18 $\pm$ 2.39 | 0.175  |
| 21       | Epoxide hydratase:Homo sapiens                                                    | 7.45 $\pm$ 2.39 | 0.175  |
| 22       | Tyrosine-protein kinase JAK2:Homo sapiens                                         | 7.37 $\pm$ 2.39 | 0.175  |
| 23       | Intestinal alkaline phosphatase:Mus musculus                                      | 5.03 $\pm$ 2.39 | 0.175  |
| 24       | PRMT5/MEP50 complex:Homo sapiens                                                  | 6.42 $\pm$ 2.39 | 0.175  |
| 25       | cAMP and cAMP-inhibited cGMP 3',5'-cyclic phosphodiesterase 10A:Rattus norvegicus | 7.37 $\pm$ 2.40 | 0.174  |

| Position | Target                                                     | pIC50           | $\tau$ |
|----------|------------------------------------------------------------|-----------------|--------|
| 26       | Muscarinic acetylcholine receptor M3:Homo sapiens          | 7.47 $\pm$ 2.40 | 0.173  |
| 27       | Cytochrome P450 2C9:Homo sapiens                           | 5.37 $\pm$ 2.40 | 0.173  |
| 28       | Acetylcholinesterase:Homo sapiens                          | 6.27 $\pm$ 2.41 | 0.173  |
| 29       | Tyrosine-protein kinase JAK1:Homo sapiens                  | 8.08 $\pm$ 2.41 | 0.173  |
| 30       | MAP kinase ERK2:Homo sapiens                               | 8.10 $\pm$ 2.41 | 0.172  |
| 31       | Cholecystokinin A receptor:Cavia porcellus                 | 6.48 $\pm$ 2.41 | 0.172  |
| 32       | Vascular endothelial growth factor receptor 2:Homo sapiens | 6.88 $\pm$ 2.41 | 0.172  |
| 33       | Ceramide glucosyltransferase:Homo sapiens                  | 7.39 $\pm$ 2.42 | 0.171  |
| 34       | Arachidonate 5-lipoxygenase:Rattus norvegicus              | 5.94 $\pm$ 2.42 | 0.171  |
| 35       | MAP kinase p38 alpha:Homo sapiens                          | 7.07 $\pm$ 2.42 | 0.171  |
| 36       | Matrix metalloproteinase 9:Homo sapiens                    | 7.23 $\pm$ 2.42 | 0.171  |
| 37       | Calpain 2:Sus scrofa                                       | 5.11 $\pm$ 2.42 | 0.171  |
| 38       | Vanilloid receptor:Homo sapiens                            | 6.88 $\pm$ 2.42 | 0.171  |
| 39       | Coagulation factor X:Homo sapiens                          | 7.11 $\pm$ 2.43 | 0.170  |
| 40       | Sodium channel protein type IX alpha subunit:Homo sapiens  | 6.43 $\pm$ 2.43 | 0.170  |
| 41       | Cholecystokinin B receptor:Homo sapiens                    | 6.61 $\pm$ 2.43 | 0.169  |
| 42       | Matrix metalloproteinase-2:Homo sapiens                    | 6.88 $\pm$ 2.43 | 0.169  |
| 43       | Neuropeptide Y receptor type 5:Rattus norvegicus           | 7.78 $\pm$ 2.43 | 0.169  |
| 44       | Matrix metalloproteinase 13:Homo sapiens                   | 7.67 $\pm$ 2.43 | 0.169  |
| 45       | P2X purinoceptor 7:Homo sapiens                            | 7.14 $\pm$ 2.44 | 0.169  |
| 46       | Poly [ADP-ribose] polymerase 14:Homo sapiens               | 5.84 $\pm$ 2.44 | 0.169  |
| 47       | Histone deacetylase 1:Homo sapiens                         | 6.69 $\pm$ 2.44 | 0.168  |
| 48       | Monoglyceride lipase:Homo sapiens                          | 6.36 $\pm$ 2.44 | 0.168  |
| 49       | Muscarinic acetylcholine receptor M2:Homo sapiens          | 6.77 $\pm$ 2.44 | 0.168  |
| 50       | Rho-associated protein kinase 2:Homo sapiens               | 7.35 $\pm$ 2.44 | 0.168  |
| 51       | c-Jun N-terminal kinase 3:Homo sapiens                     | 6.38 $\pm$ 2.44 | 0.168  |
| 52       | Cholinesterase:Equus caballus                              | 5.72 $\pm$ 2.45 | 0.167  |

| Position | Target                                                        | pIC50           | $\tau$ |
|----------|---------------------------------------------------------------|-----------------|--------|
| 53       | Beta-secretase 1:Homo sapiens                                 | 6.68 $\pm$ 2.45 | 0.167  |
| 54       | Muscarinic acetylcholine receptor M1:Homo sapiens             | 6.68 $\pm$ 2.45 | 0.167  |
| 55       | Nicotinamide phosphoribosyltransferase:Homo sapiens           | 7.42 $\pm$ 2.45 | 0.167  |
| 56       | Serotonin 2b (5-HT2b) receptor:Homo sapiens                   | 6.63 $\pm$ 2.45 | 0.167  |
| 57       | Matrix metalloproteinase-1:Homo sapiens                       | 6.26 $\pm$ 2.45 | 0.167  |
| 58       | LIM domain kinase 2:Homo sapiens                              | 7.62 $\pm$ 2.45 | 0.167  |
| 59       | Neuropeptide Y receptor type 2:Homo sapiens                   | 6.06 $\pm$ 2.45 | 0.166  |
| 60       | c-Jun N-terminal kinase 1:Homo sapiens                        | 6.69 $\pm$ 2.45 | 0.166  |
| 61       | Dopamine D2 receptor:Rattus norvegicus                        | 6.75 $\pm$ 2.45 | 0.166  |
| 62       | Calcitonin gene-related peptide type 1 receptor:Homo sapiens  | 7.56 $\pm$ 2.45 | 0.166  |
| 63       | Neuropeptide Y receptor type 5:Mus musculus                   | 8.13 $\pm$ 2.46 | 0.166  |
| 64       | Orexin receptor 1:Homo sapiens                                | 6.85 $\pm$ 2.46 | 0.166  |
| 65       | Orexin receptor 2:Homo sapiens                                | 7.00 $\pm$ 2.46 | 0.166  |
| 66       | Butyrylcholinesterase:Mus musculus                            | 6.45 $\pm$ 2.46 | 0.166  |
| 67       | Neurokinin 1 receptor:Homo sapiens                            | 7.92 $\pm$ 2.46 | 0.166  |
| 68       | Serine/threonine-protein kinase AKT:Homo sapiens              | 6.97 $\pm$ 2.46 | 0.165  |
| 69       | Alkaline phosphatase, tissue-nonspecific isozyme:Homo sapiens | 5.06 $\pm$ 2.46 | 0.165  |
| 70       | Serine/threonine-protein kinase Chk1:Homo sapiens             | 7.41 $\pm$ 2.46 | 0.165  |
| 71       | Matrix metalloproteinase 8:Homo sapiens                       | 7.49 $\pm$ 2.46 | 0.165  |
| 72       | Vanilloid receptor:Rattus norvegicus                          | 6.82 $\pm$ 2.46 | 0.165  |
| 73       | Acetylcholinesterase:Electrophorus electricus                 | 5.98 $\pm$ 2.46 | 0.165  |
| 74       | Matrix metalloproteinase 3:Homo sapiens                       | 6.75 $\pm$ 2.46 | 0.165  |
| 75       | ADAM17:Sus scrofa                                             | 8.11 $\pm$ 2.46 | 0.165  |
| 76       | Sodium/calcium exchanger 1:Homo sapiens                       | 6.27 $\pm$ 2.46 | 0.165  |
| 77       | Ghrelin receptor:Homo sapiens                                 | 7.24 $\pm$ 2.46 | 0.165  |
| 78       | Sodium channel protein type V alpha subunit:Homo sapiens      | 5.57 $\pm$ 2.46 | 0.165  |
| 79       | Tankyrase-1:Homo sapiens                                      | 6.86 $\pm$ 2.47 | 0.164  |

| Position | Target                                                                                       | pIC50           | $\tau$ |
|----------|----------------------------------------------------------------------------------------------|-----------------|--------|
| 80       | Cholecystokinin A receptor:Rattus norvegicus                                                 | 6.35 $\pm$ 2.47 | 0.164  |
| 81       | Phosphodiesterase 10A:Homo sapiens                                                           | 7.83 $\pm$ 2.47 | 0.164  |
| 82       | Prostanoid DP receptor:Mus musculus                                                          | 7.89 $\pm$ 2.47 | 0.164  |
| 83       | Protein farnesyltransferase:Homo sapiens                                                     | 6.95 $\pm$ 2.47 | 0.164  |
| 84       | Transforming protein RhoA:Homo sapiens                                                       | 4.93 $\pm$ 2.47 | 0.164  |
| 85       | DNA-dependent protein kinase:Homo sapiens                                                    | 6.38 $\pm$ 2.47 | 0.164  |
| 86       | Muscarinic acetylcholine receptor M5:Homo sapiens                                            | 6.03 $\pm$ 2.47 | 0.164  |
| 87       | Mu opioid receptor:Homo sapiens                                                              | 6.59 $\pm$ 2.47 | 0.164  |
| 88       | Delta opioid receptor:Homo sapiens                                                           | 7.28 $\pm$ 2.47 | 0.163  |
| 89       | Acetylcholinesterase:Mus musculus                                                            | 6.35 $\pm$ 2.47 | 0.163  |
| 90       | Mitochondrial import inner membrane translocase subunit TIM10:Saccharomyces cerevisiae S288c | 4.69 $\pm$ 2.48 | 0.163  |
| 91       | Tyrosine-protein kinase receptor FLT3:Homo sapiens                                           | 6.93 $\pm$ 2.48 | 0.163  |
| 92       | ADAM17:Homo sapiens                                                                          | 6.97 $\pm$ 2.48 | 0.163  |
| 93       | Alpha-1,6-mannosyl-glycoprotein 2-beta-N-acetylglucosaminyltransferase:Homo sapiens          | 7.17 $\pm$ 2.48 | 0.163  |
| 94       | Melanin-concentrating hormone receptor 1:Mus musculus                                        | 7.16 $\pm$ 2.48 | 0.163  |
| 95       | Sodium-dependent proline transporter:Homo sapiens                                            | 6.54 $\pm$ 2.48 | 0.163  |
| 96       | Tyrosine-protein kinase TYK2:Homo sapiens                                                    | 6.71 $\pm$ 2.48 | 0.163  |
| 97       | Smoothened homolog:Homo sapiens                                                              | 6.87 $\pm$ 2.48 | 0.163  |
| 98       | Integrin alpha-V/beta-3:Homo sapiens                                                         | 7.65 $\pm$ 2.48 | 0.163  |
| 99       | Membrane-bound transcription factor site-1 protease:Homo sapiens                             | 6.43 $\pm$ 2.48 | 0.163  |
| 100      | Butyrylcholinesterase:Homo sapiens                                                           | 6.08 $\pm$ 2.48 | 0.162  |

## 2. Inhibition mechanism profiles

**Figure S1.** Inhibition kinetics and Lineweaver-Burk plot ( $r^2 = 0.996$ ) for *ee*AChE (0.09 U/mL) and **1** (0-500 nM) by using different substrate (acetylthiocholine iodide) concentrations (50-300  $\mu$ M). The replot ( $r^2 = 0.995$ ) of the slopes versus  $[I]$  determined the  $K_i$  (56 nM) as the  $x$ -axis intercept. (○) no inhibitor, (●) 50 nM, (■) 100 nM, (◆) 200 nM, (▲) 500 nM.

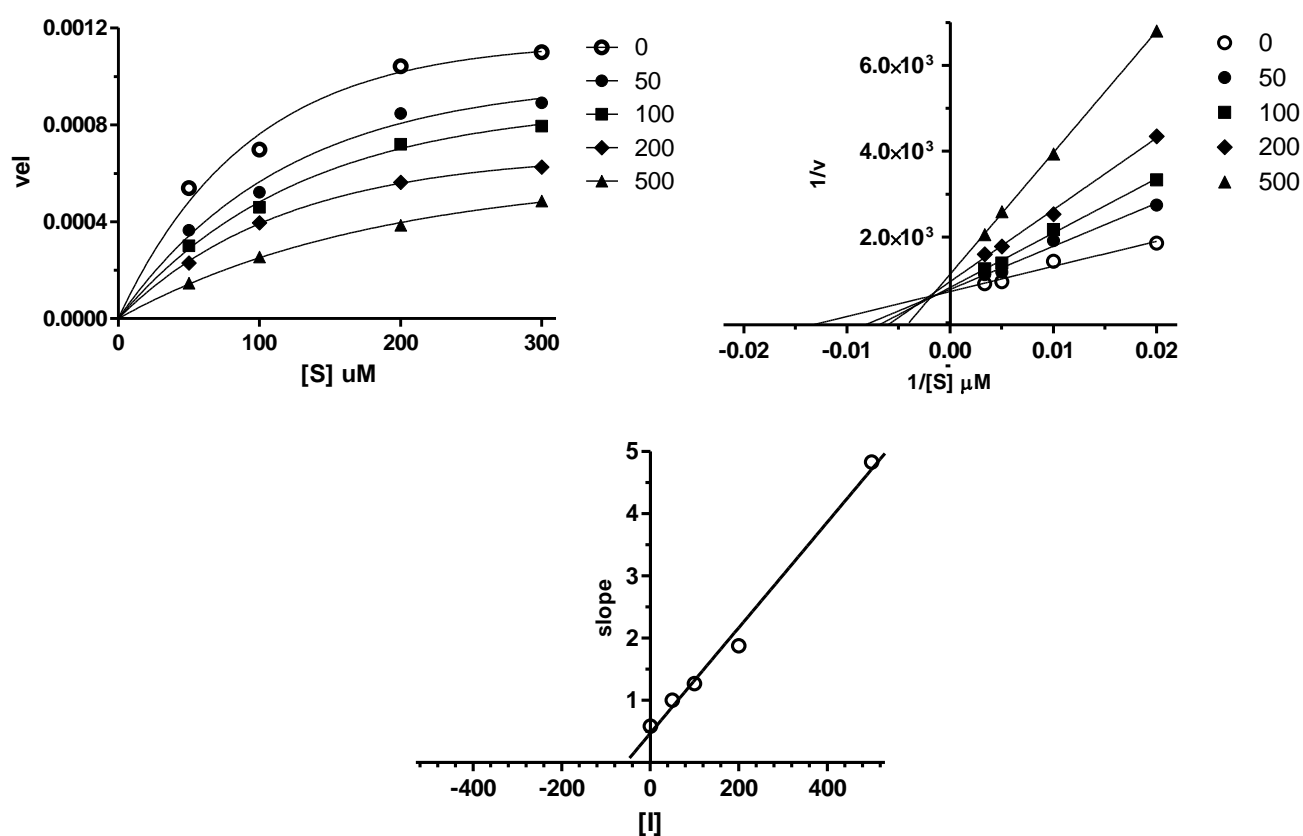

**Figure S2.** Inhibition kinetics and Lineweaver-Burk plot ( $r^2 = 0.964$ - $0.996$ ) for eqBChE (0.18 U/mL) and **14** (0-1  $\mu$ M) by using different substrate (butyrylthiocholine iodide) concentrations (50-300  $\mu$ M). The replot ( $r^2 = 0.9914$ ) of the slopes versus [I] determined the  $K_i$  (104 nM) as the x-axis intercept. (○) no inhibitor, (●) 50 nM, (■) 100 nM, (◆) 200 nM, (▲) 500 nM, (▼) 1  $\mu$ M.

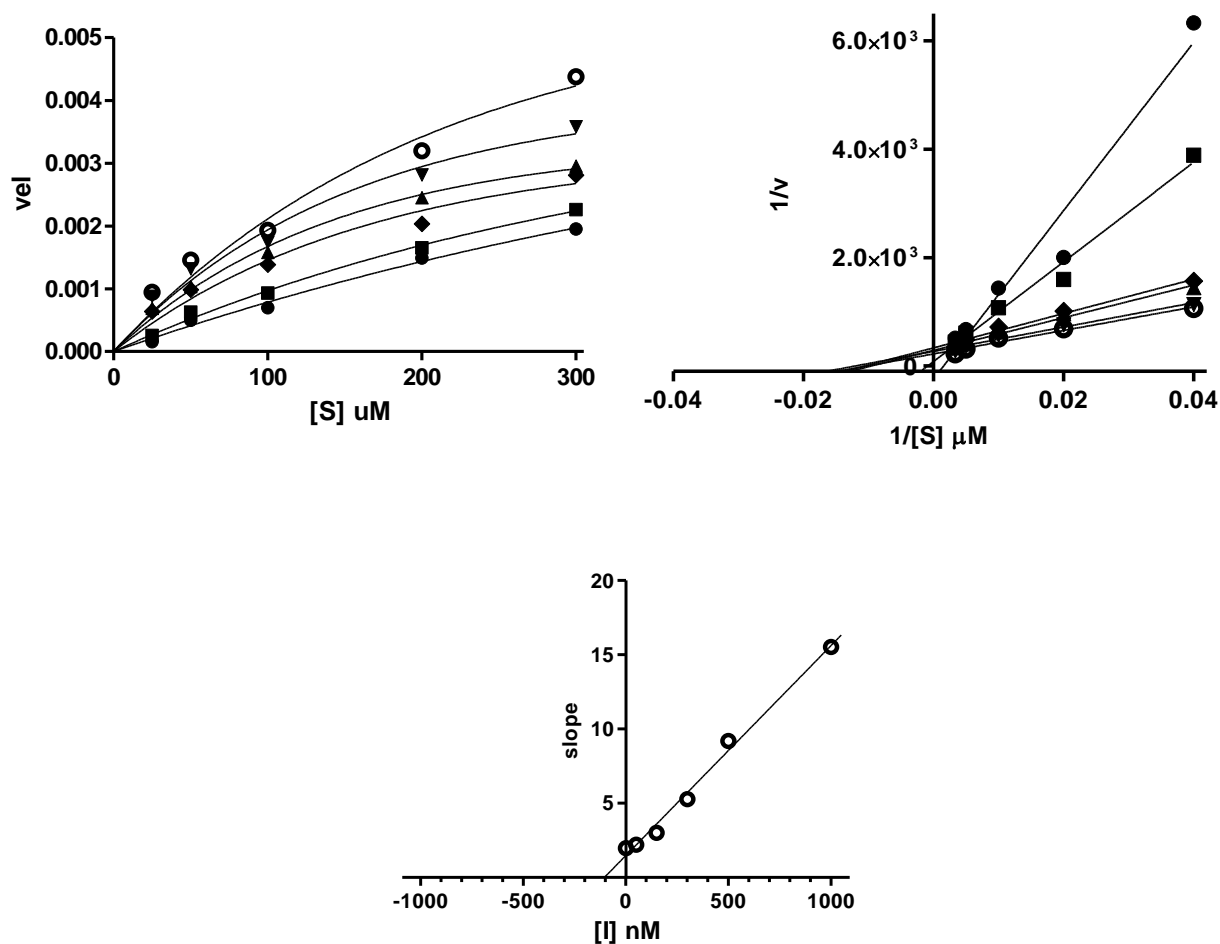

### 3. Molecular modelling

Table S1.

Similarity matrix based on four different MIFs computed for BChE and FXa with BioGPS.

|            | <b>H</b> | <b>CRY</b> | <b>N1</b> | <b>O</b> |
|------------|----------|------------|-----------|----------|
| <b>H</b>   | 0.75     | 0.74       | 0.74      | 0.71     |
| <b>CRY</b> | 0.74     | 0.75       | 0.74      | 0.72     |
| <b>N1</b>  | 0.74     | 0.74       | 0.73      | 0.71     |
| <b>O</b>   | 0.71     | 0.72       | 0.71      | 0.70     |

Table S2.

Similarity matrix based on four different MIFs computed for of AChE and thrombin with BioGPS.

|            | <b>H</b> | <b>CRY</b> | <b>N1</b> | <b>O</b> |
|------------|----------|------------|-----------|----------|
| <b>H</b>   | 0.77     | 0.75       | 0.76      | 0.75     |
| <b>CRY</b> | 0.75     | 0.75       | 0.75      | 0.73     |
| <b>N1</b>  | 0.76     | 0.75       | 0.77      | 0.75     |
| <b>O</b>   | 0.75     | 0.73       | 0.75      | 0.75     |



#### 4. <sup>1</sup>H NMR spectra

Compound **9**

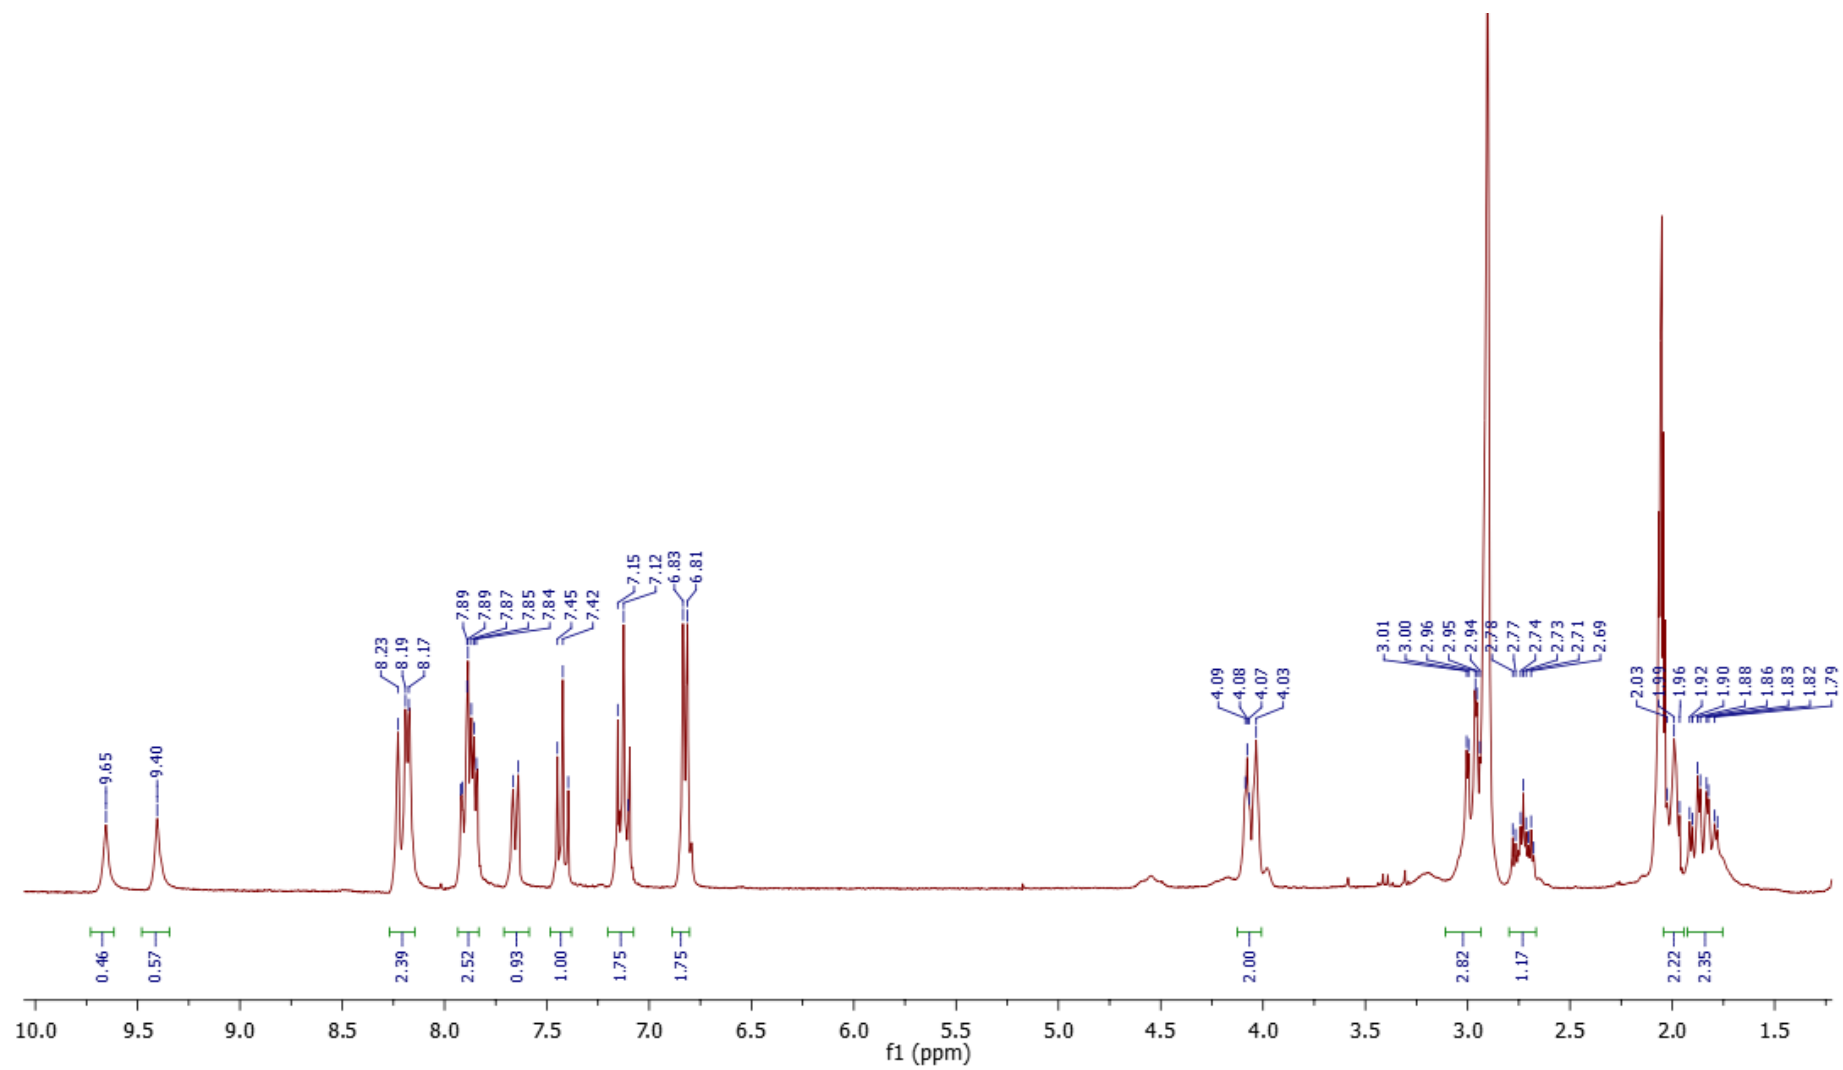

# Compound 10

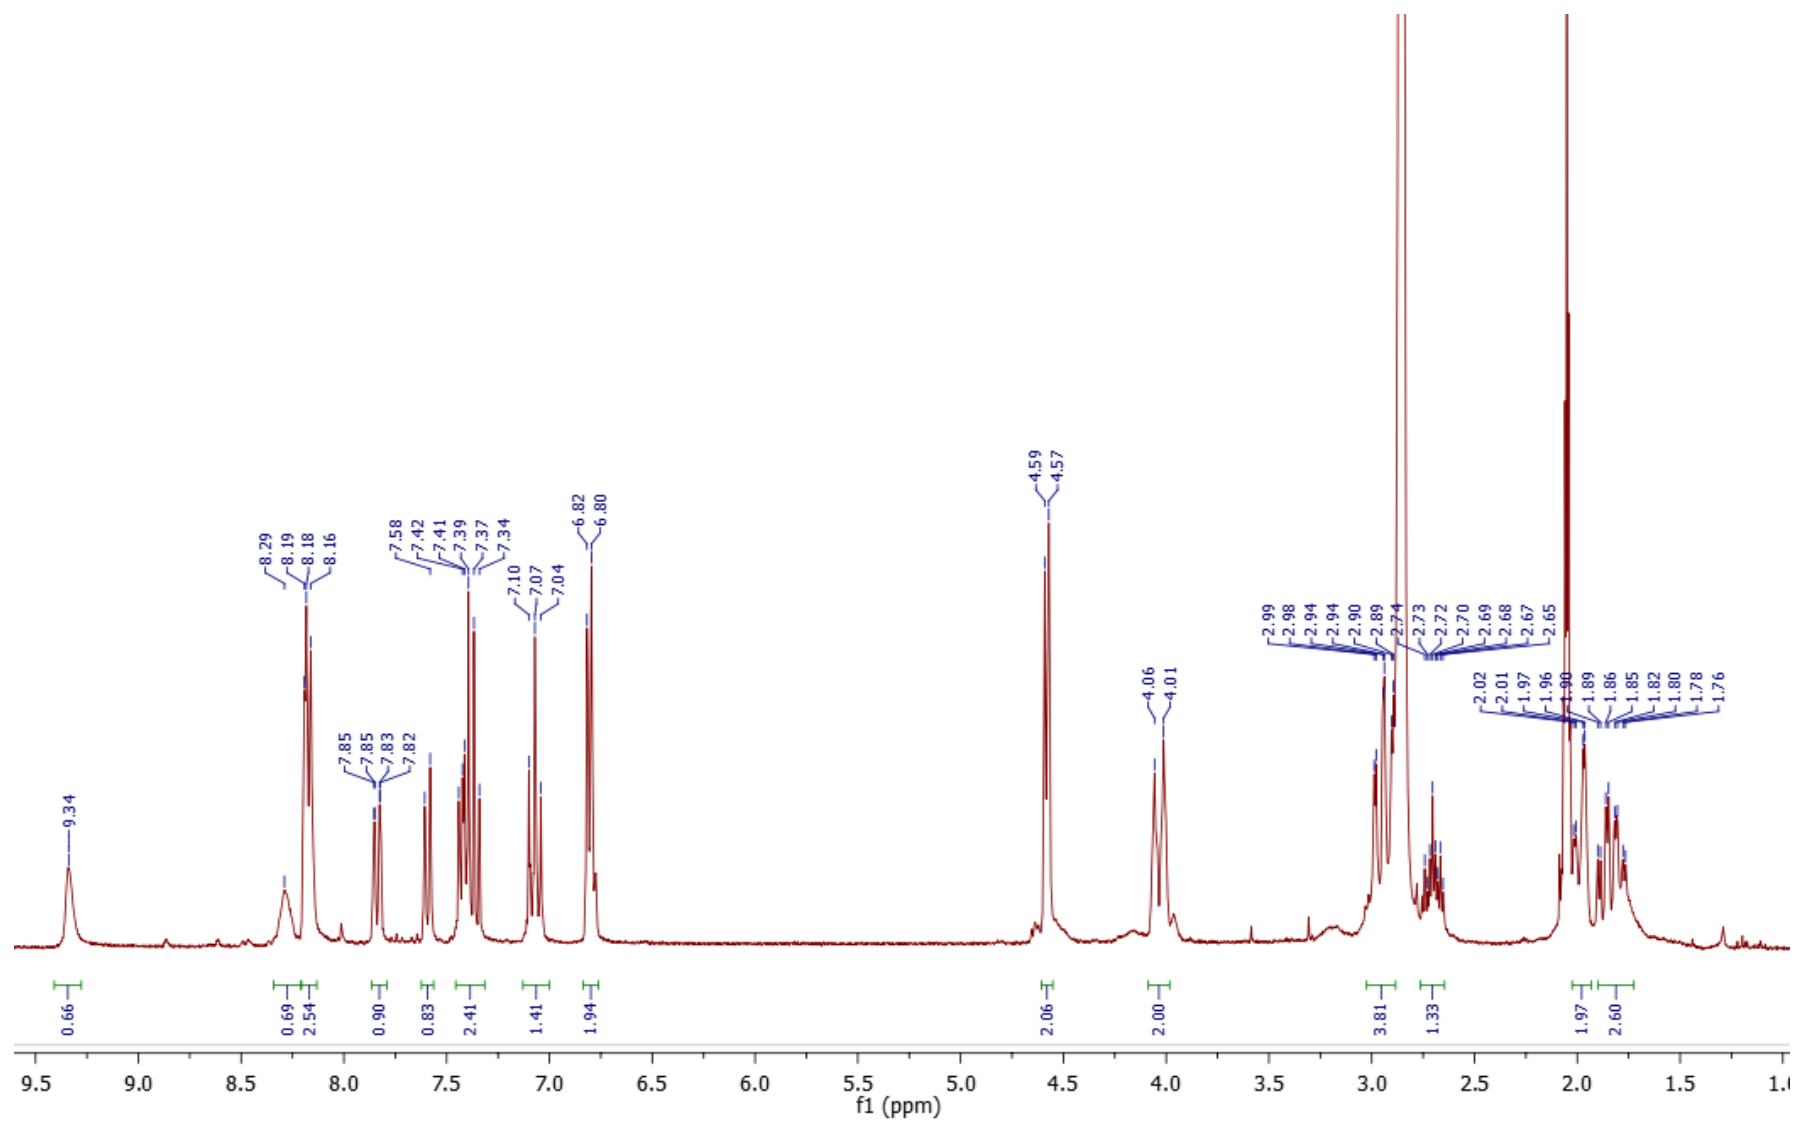

Compound 11

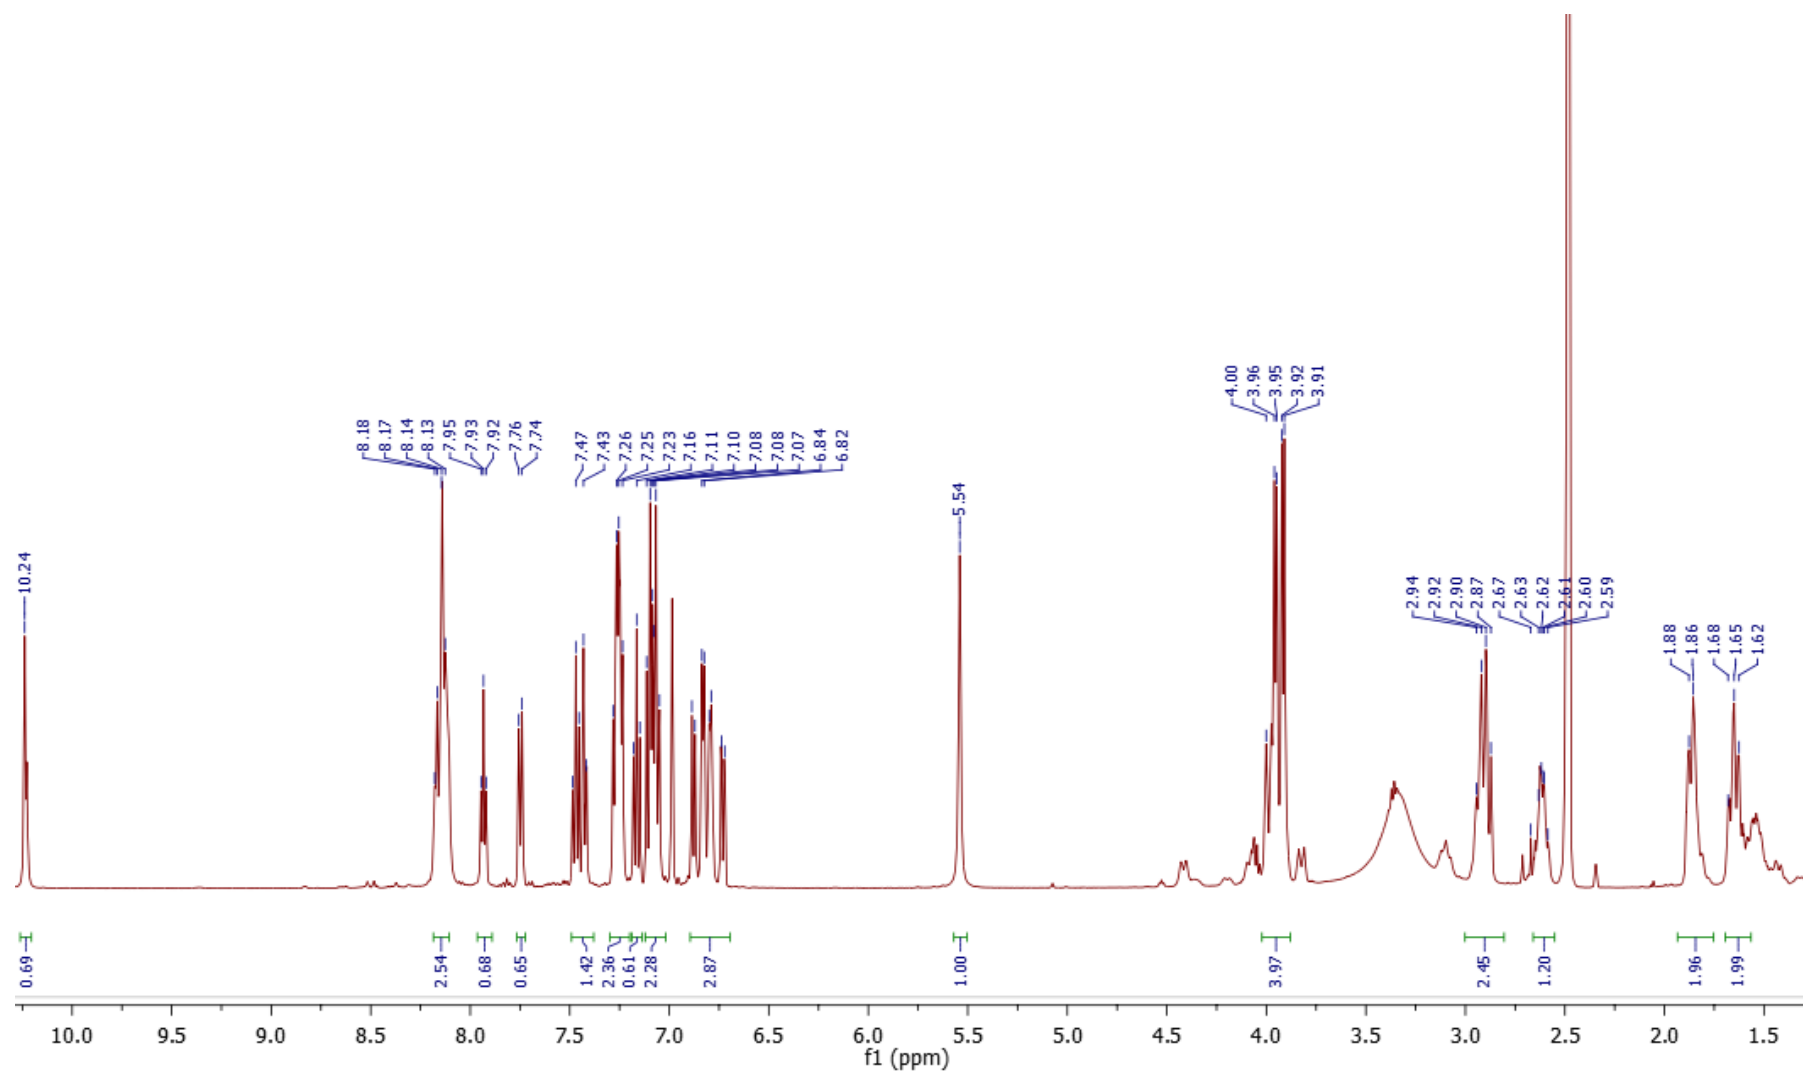

# Compound 12

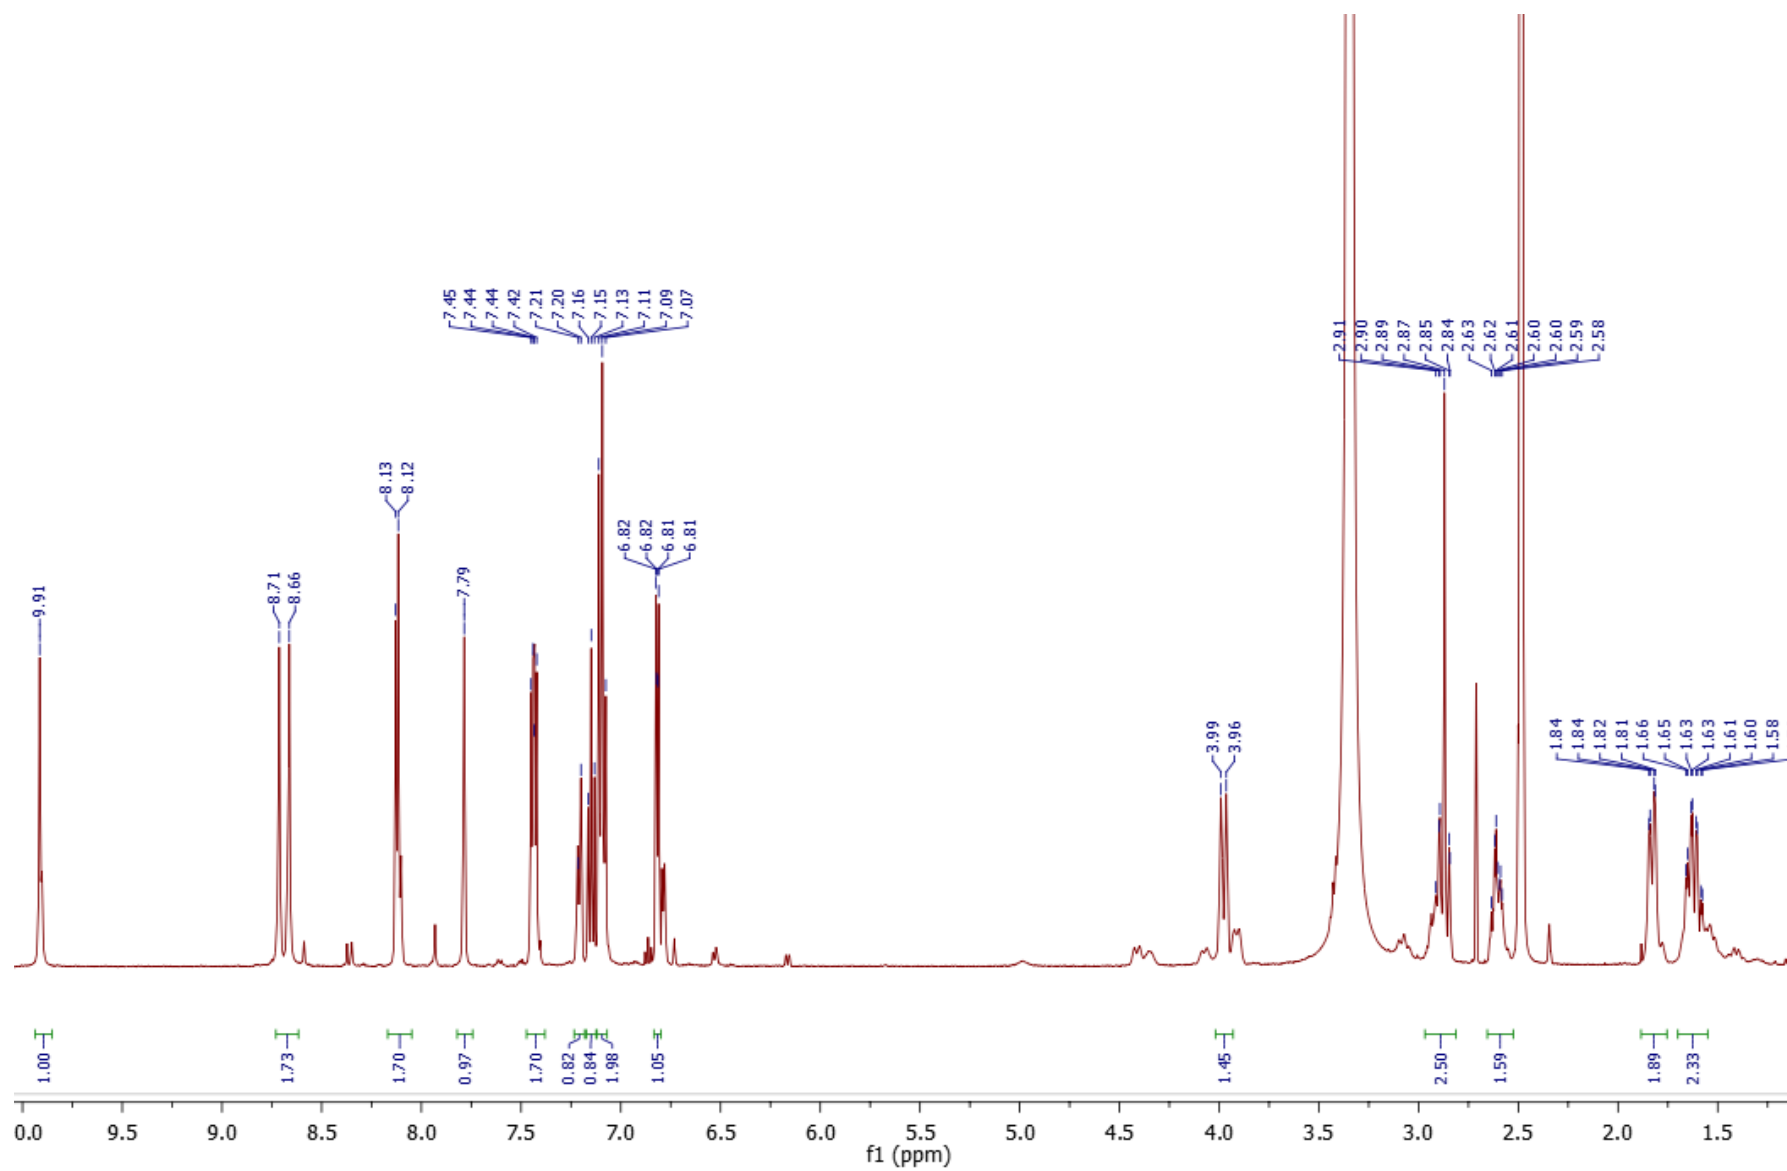

Compound 14

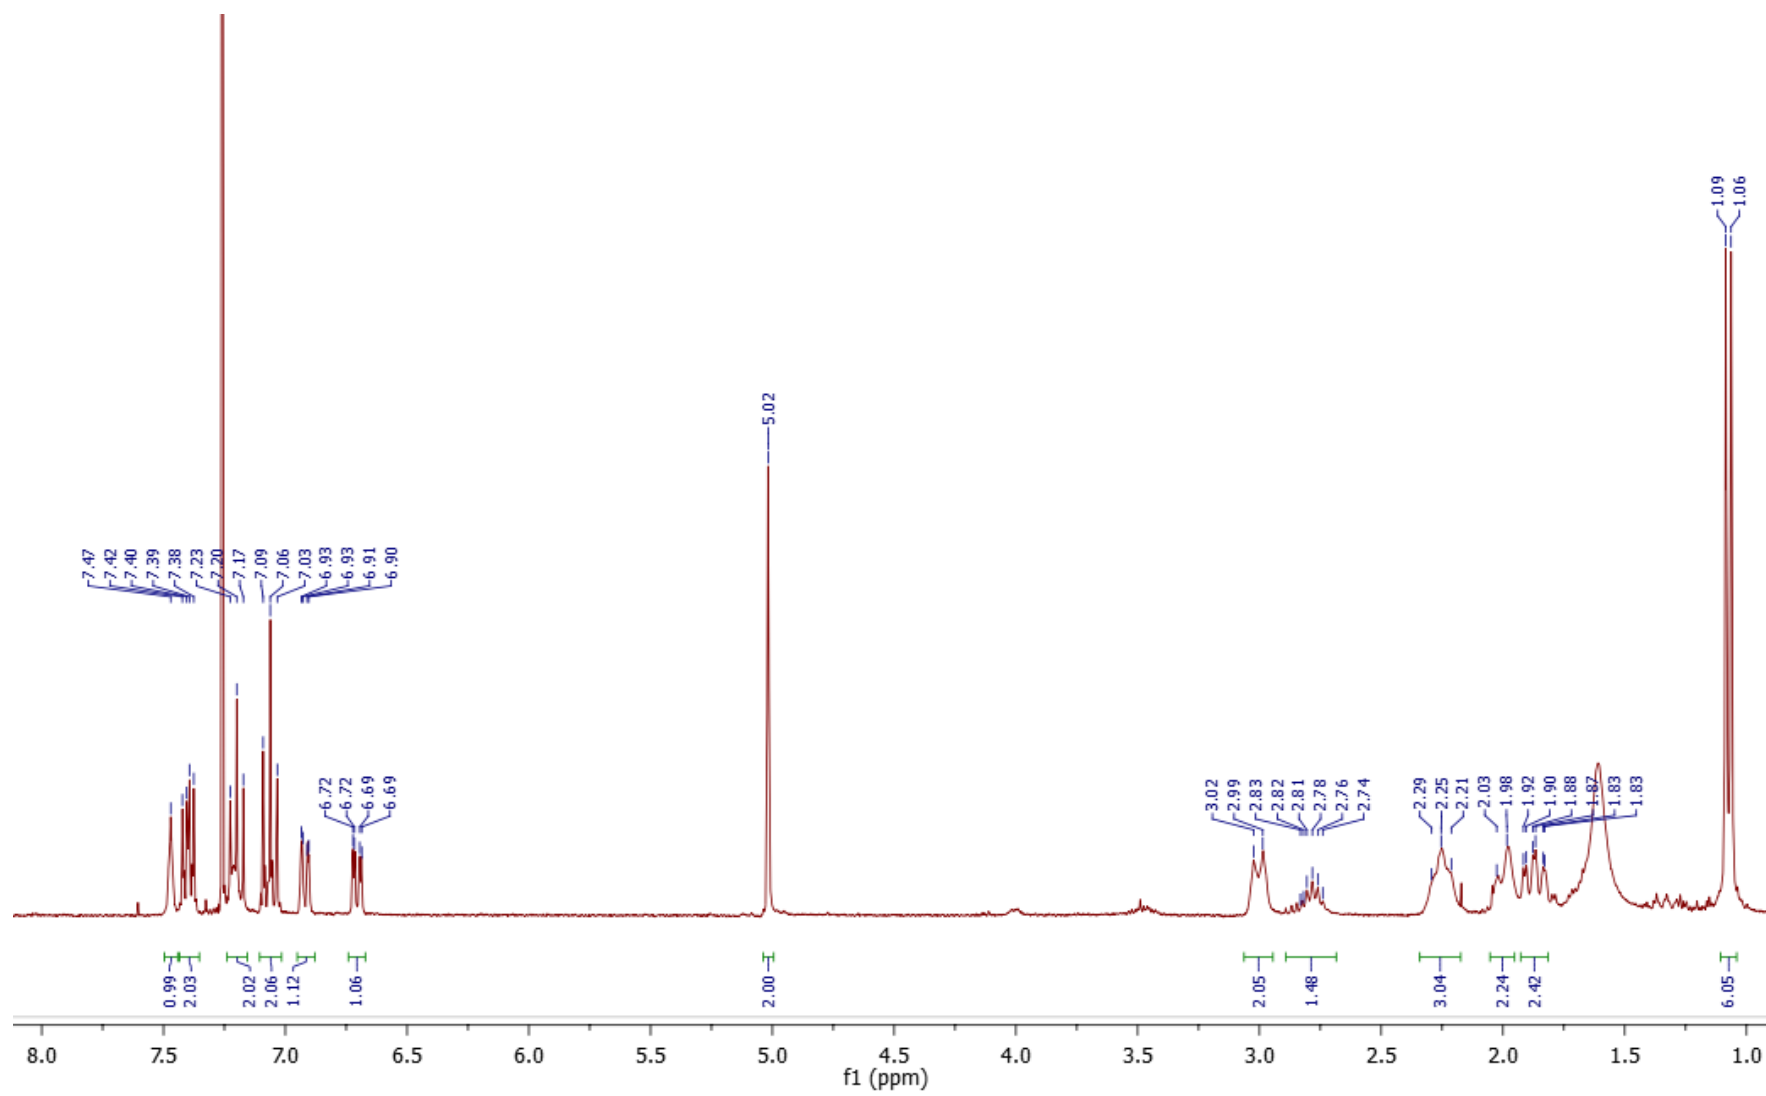

Compound 15

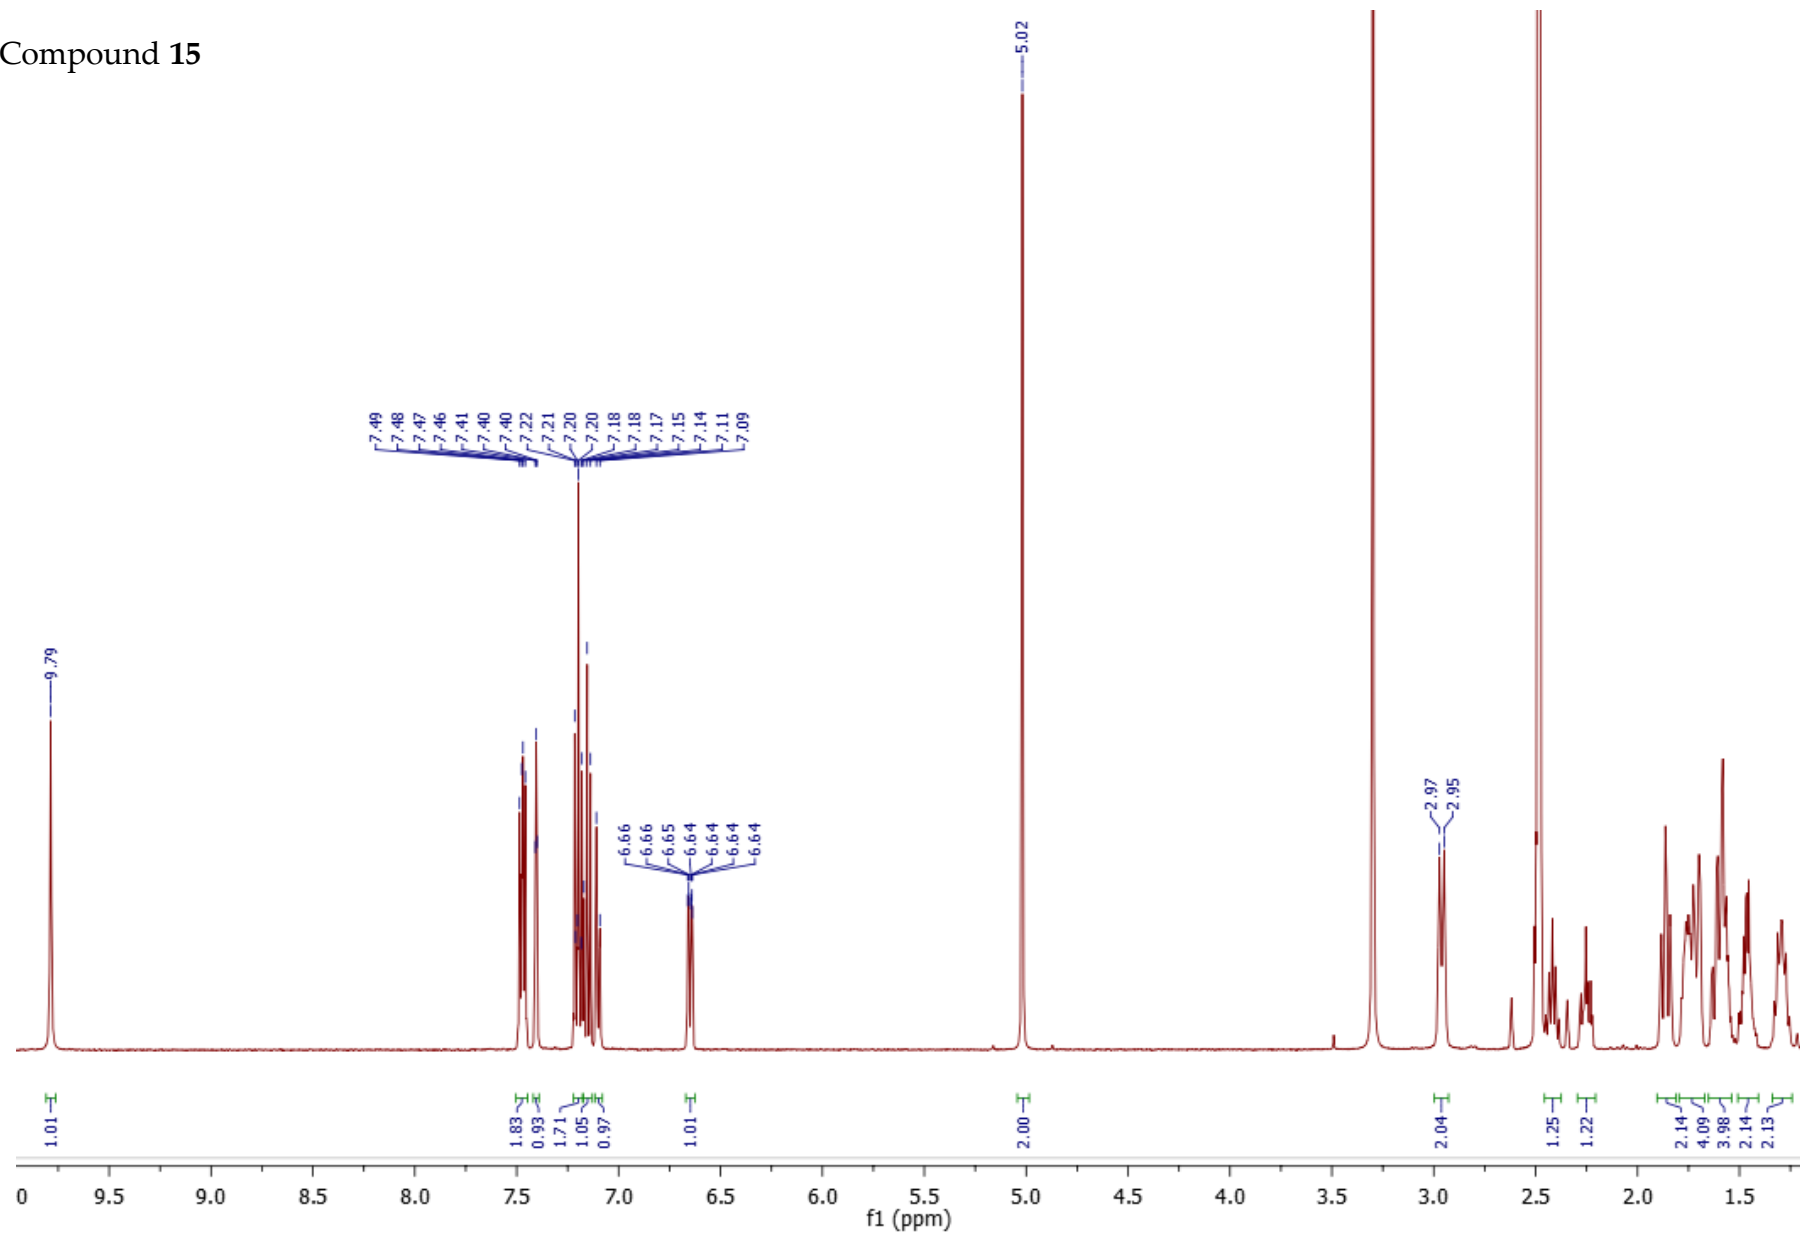

Compound 16

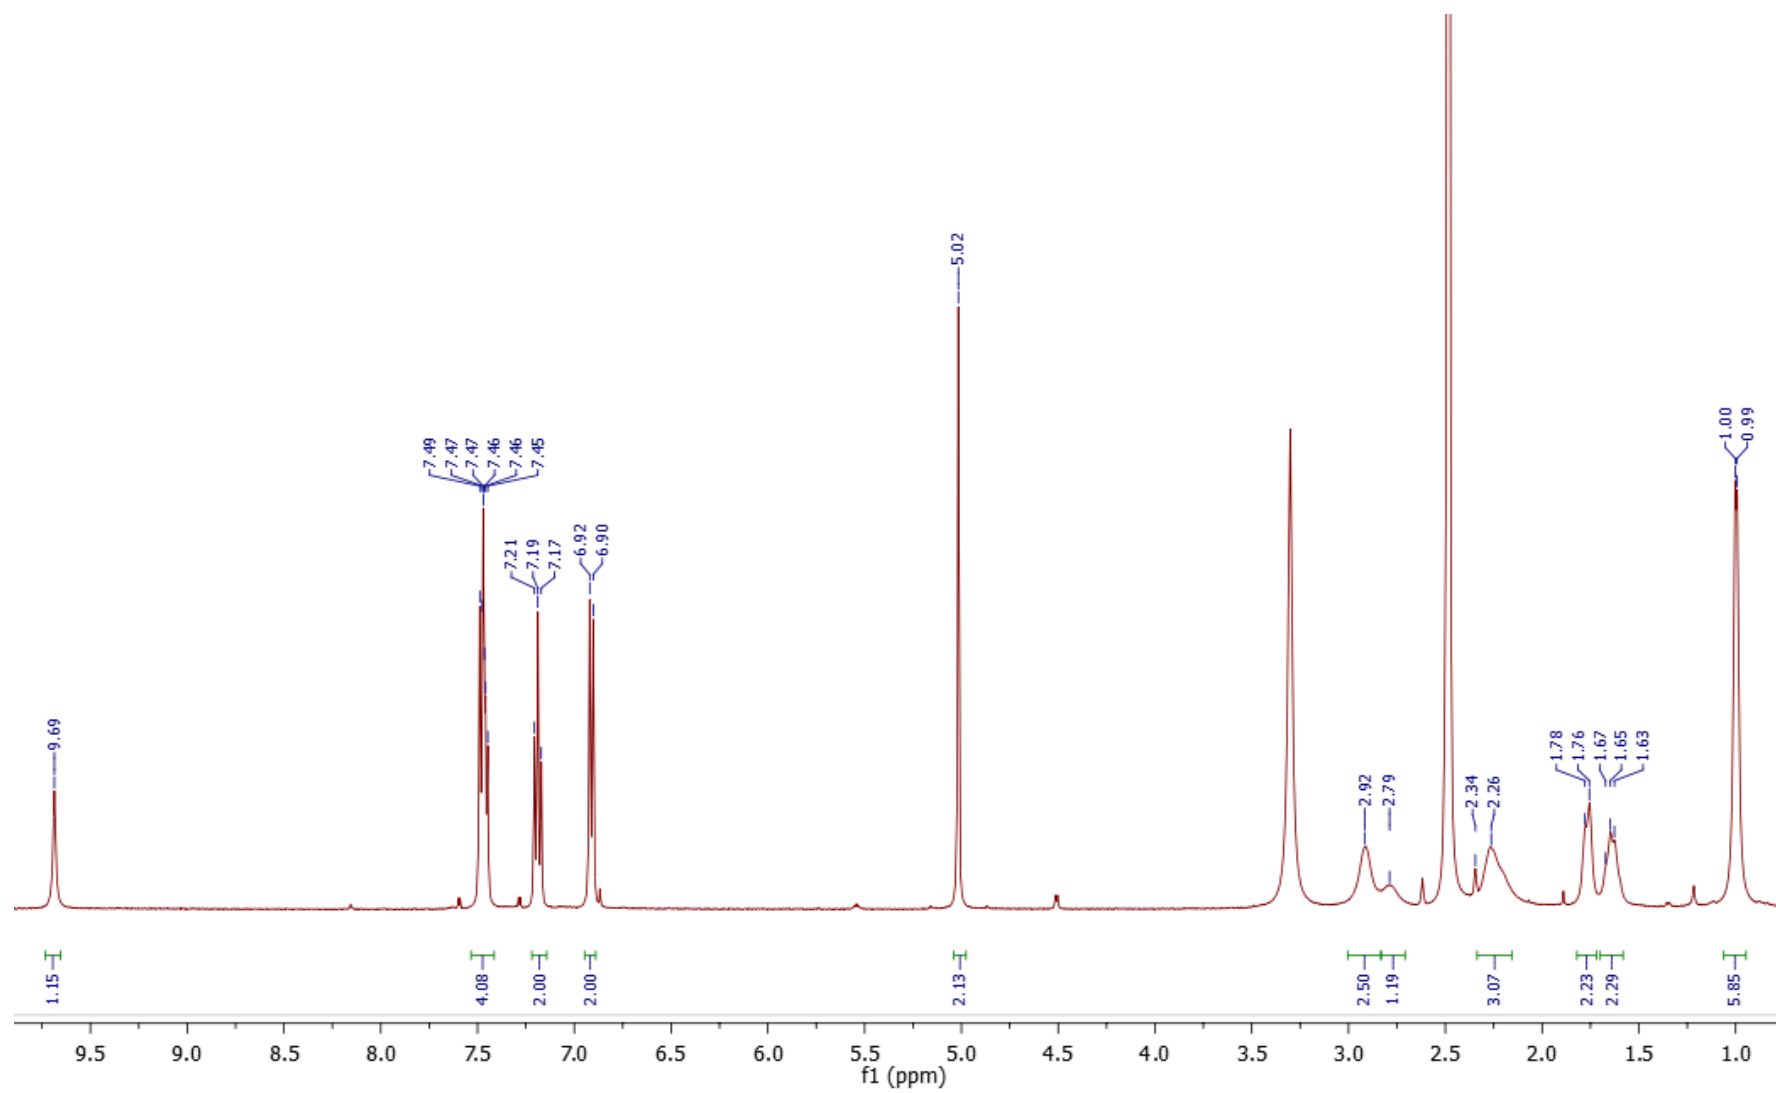

# Compound 17

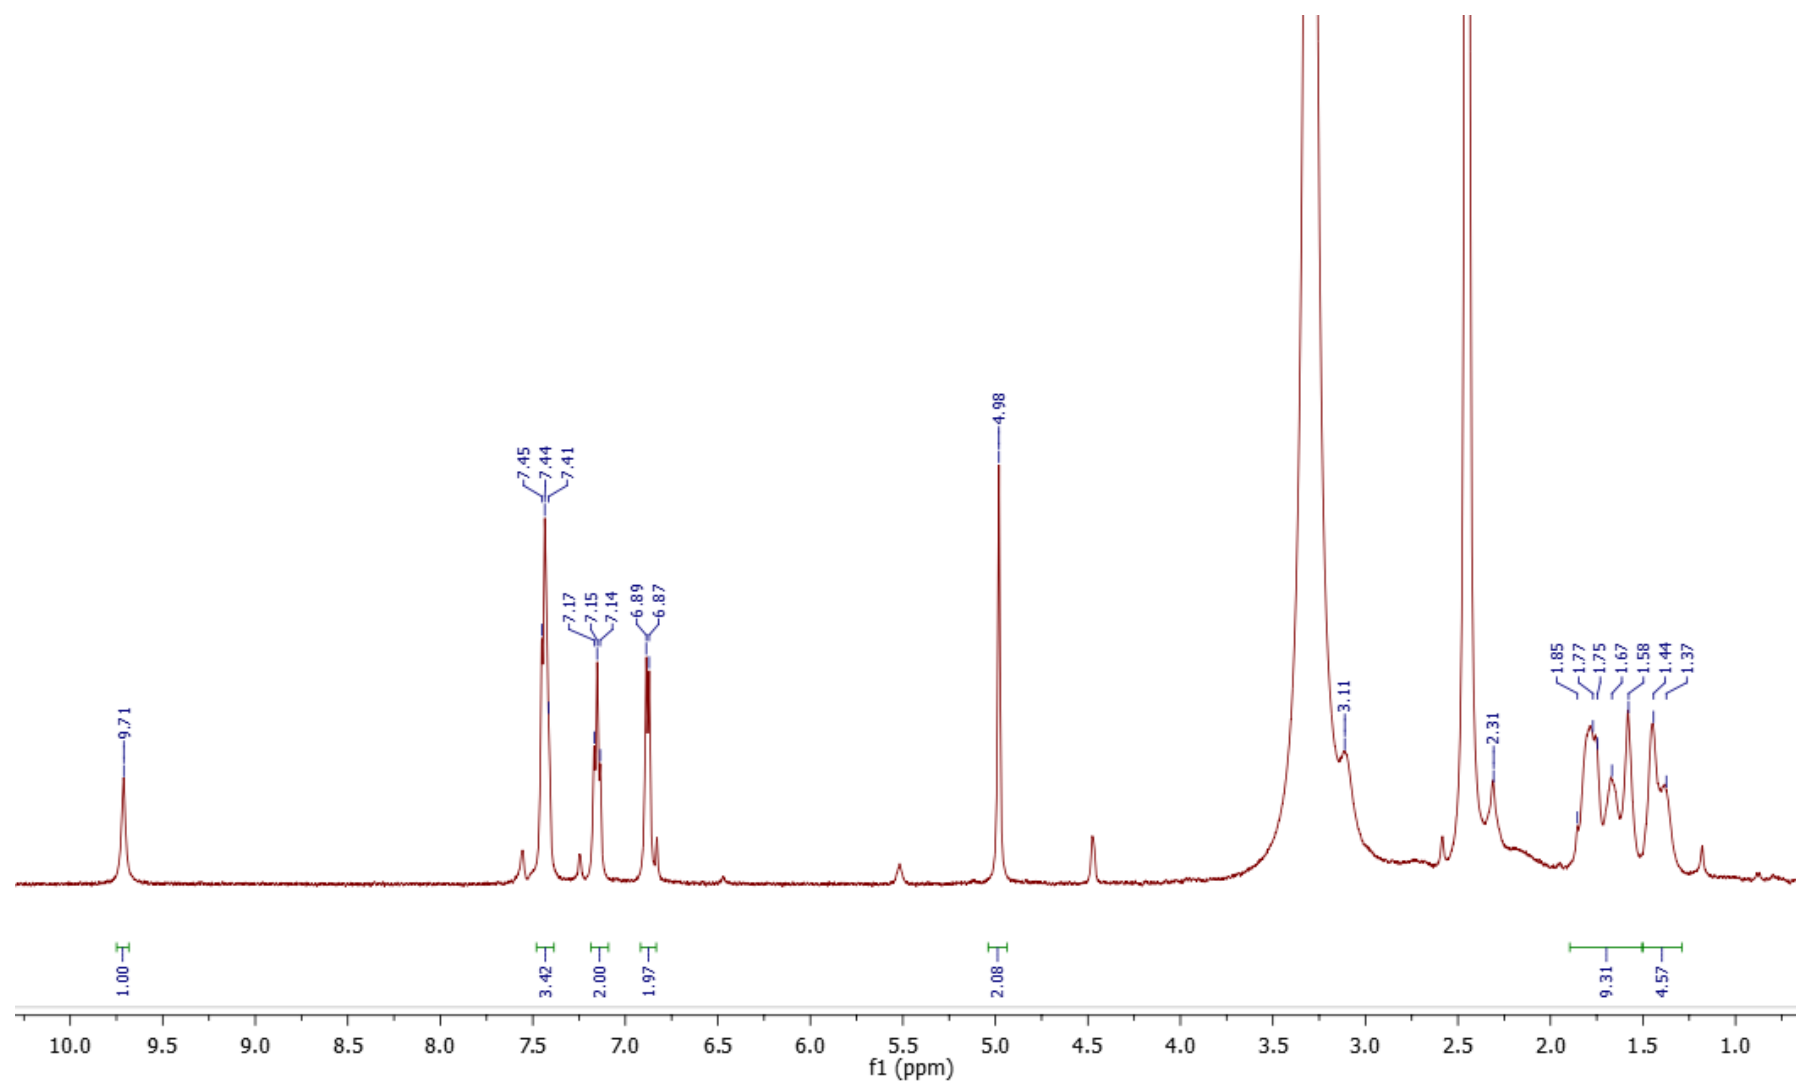



Compound 18

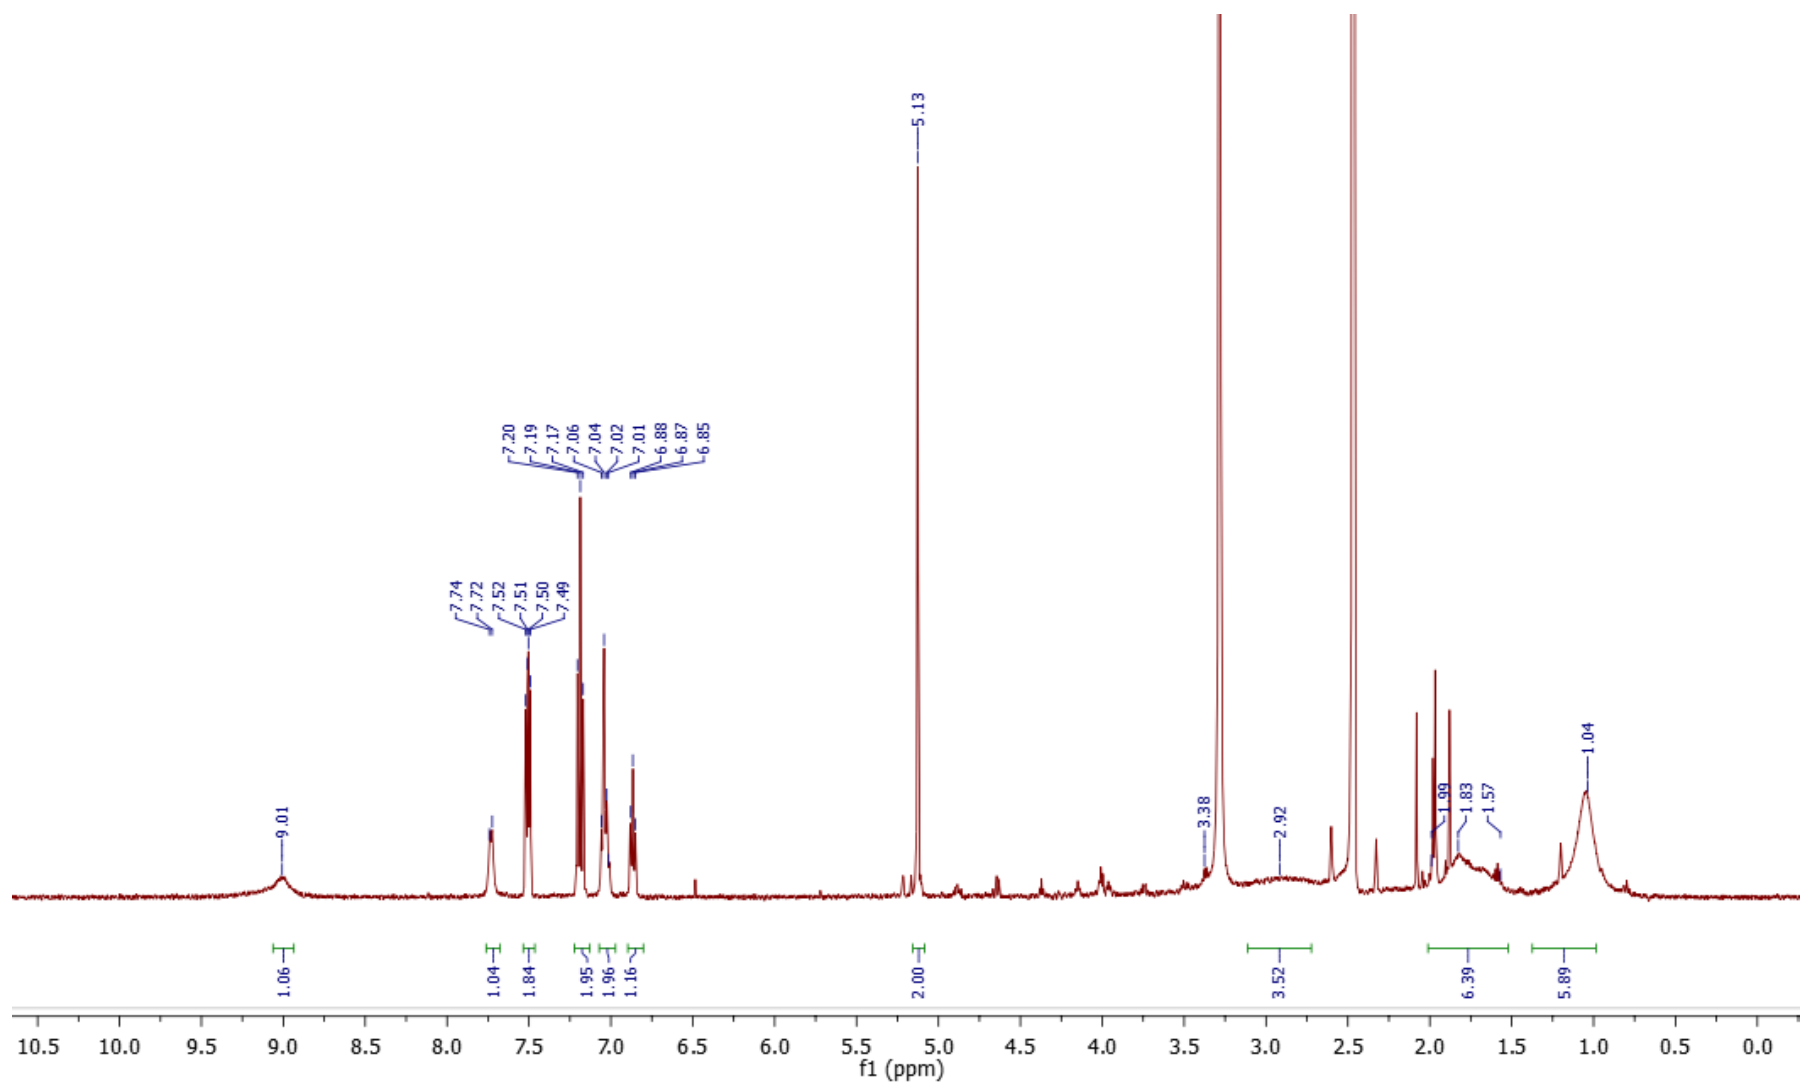

Compound 20

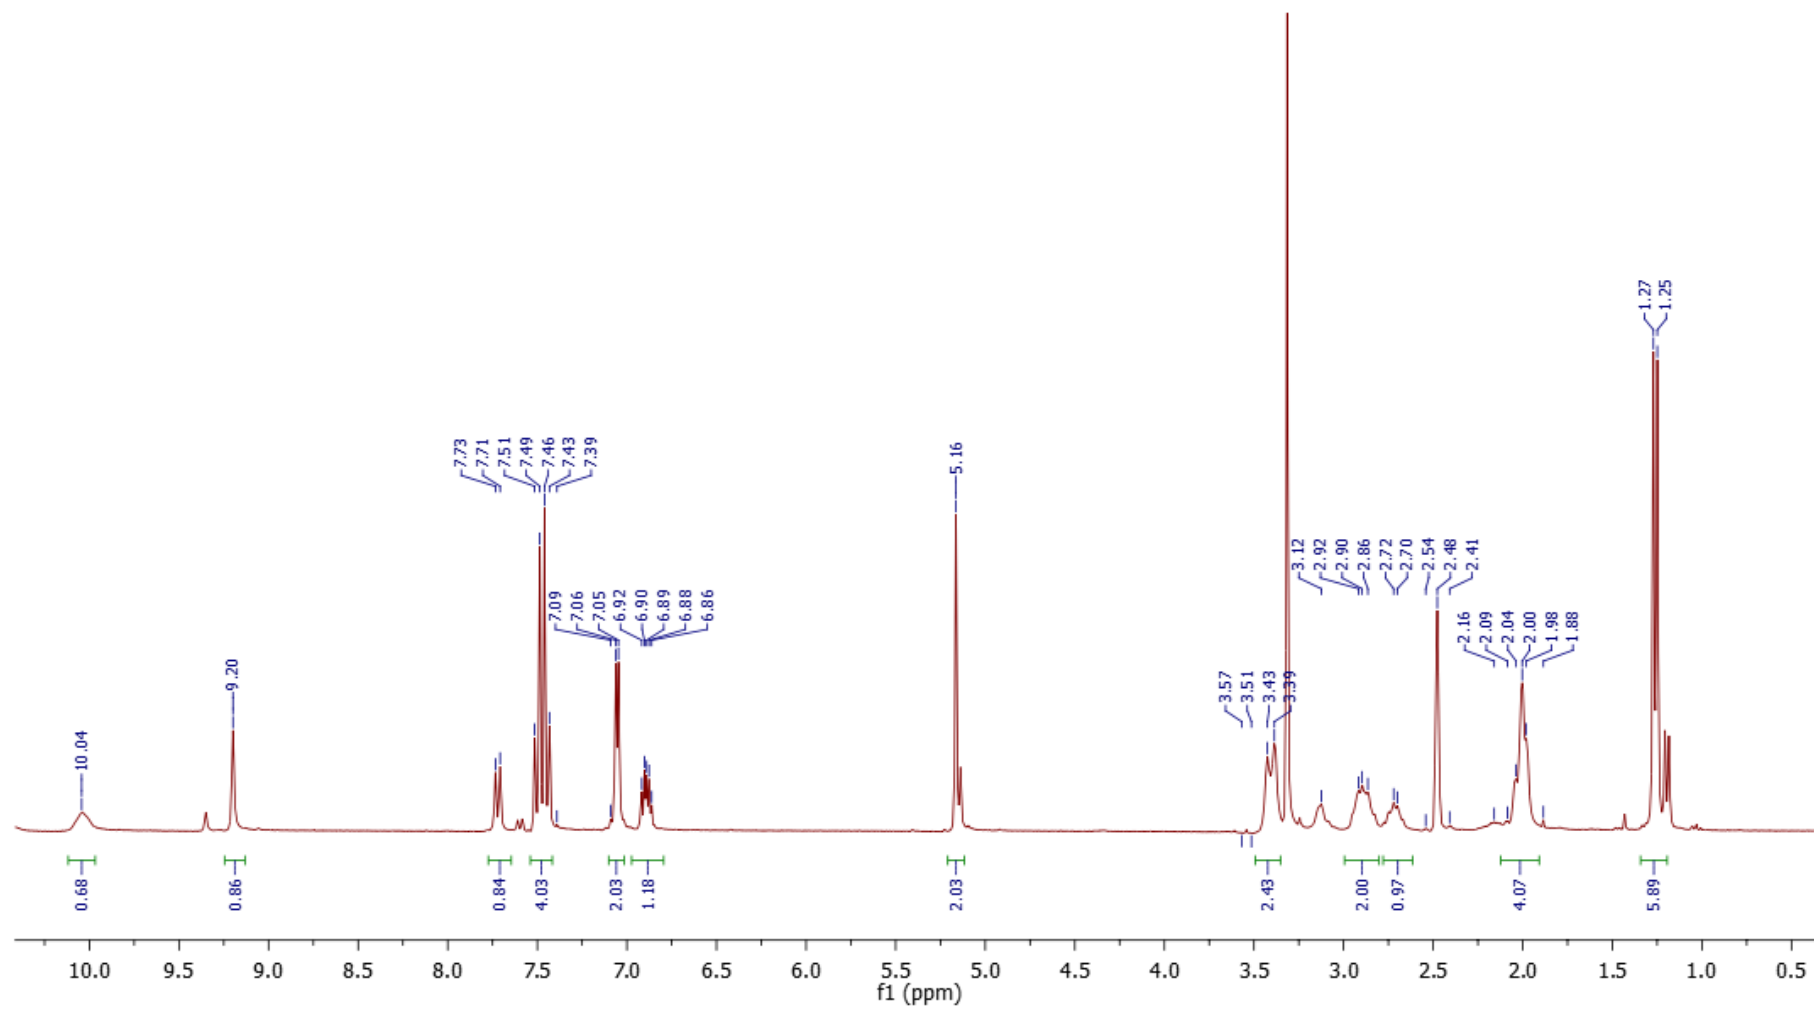

# Compound 21

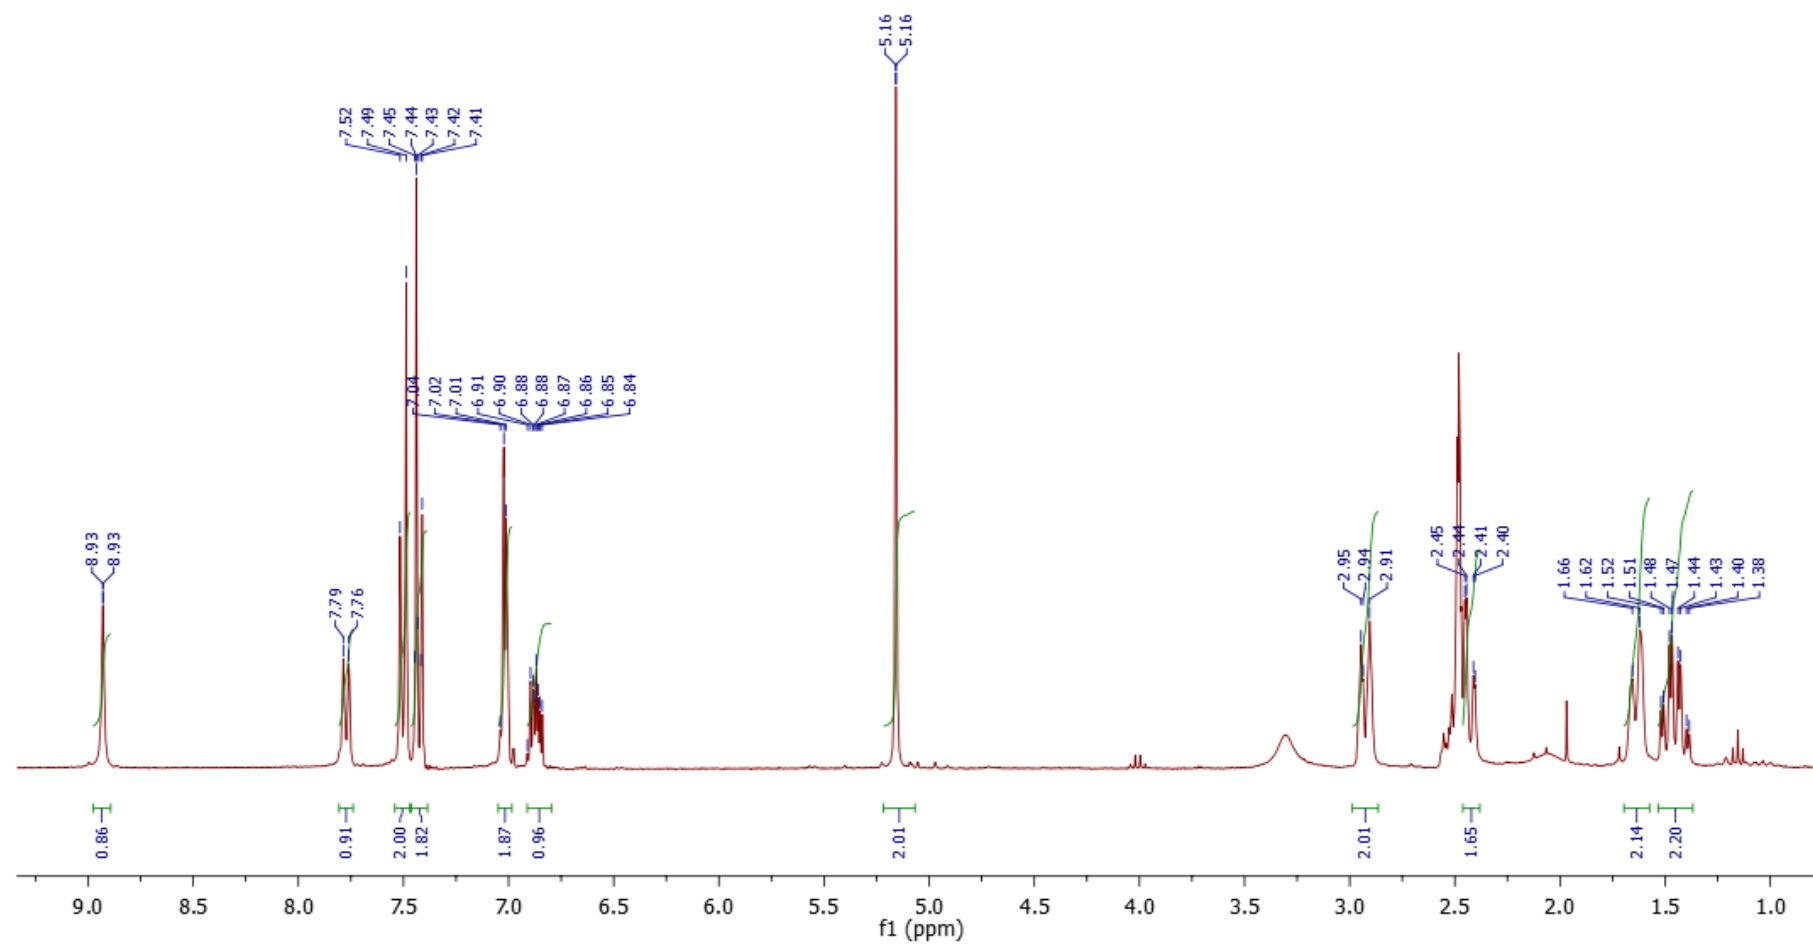

Compound 28

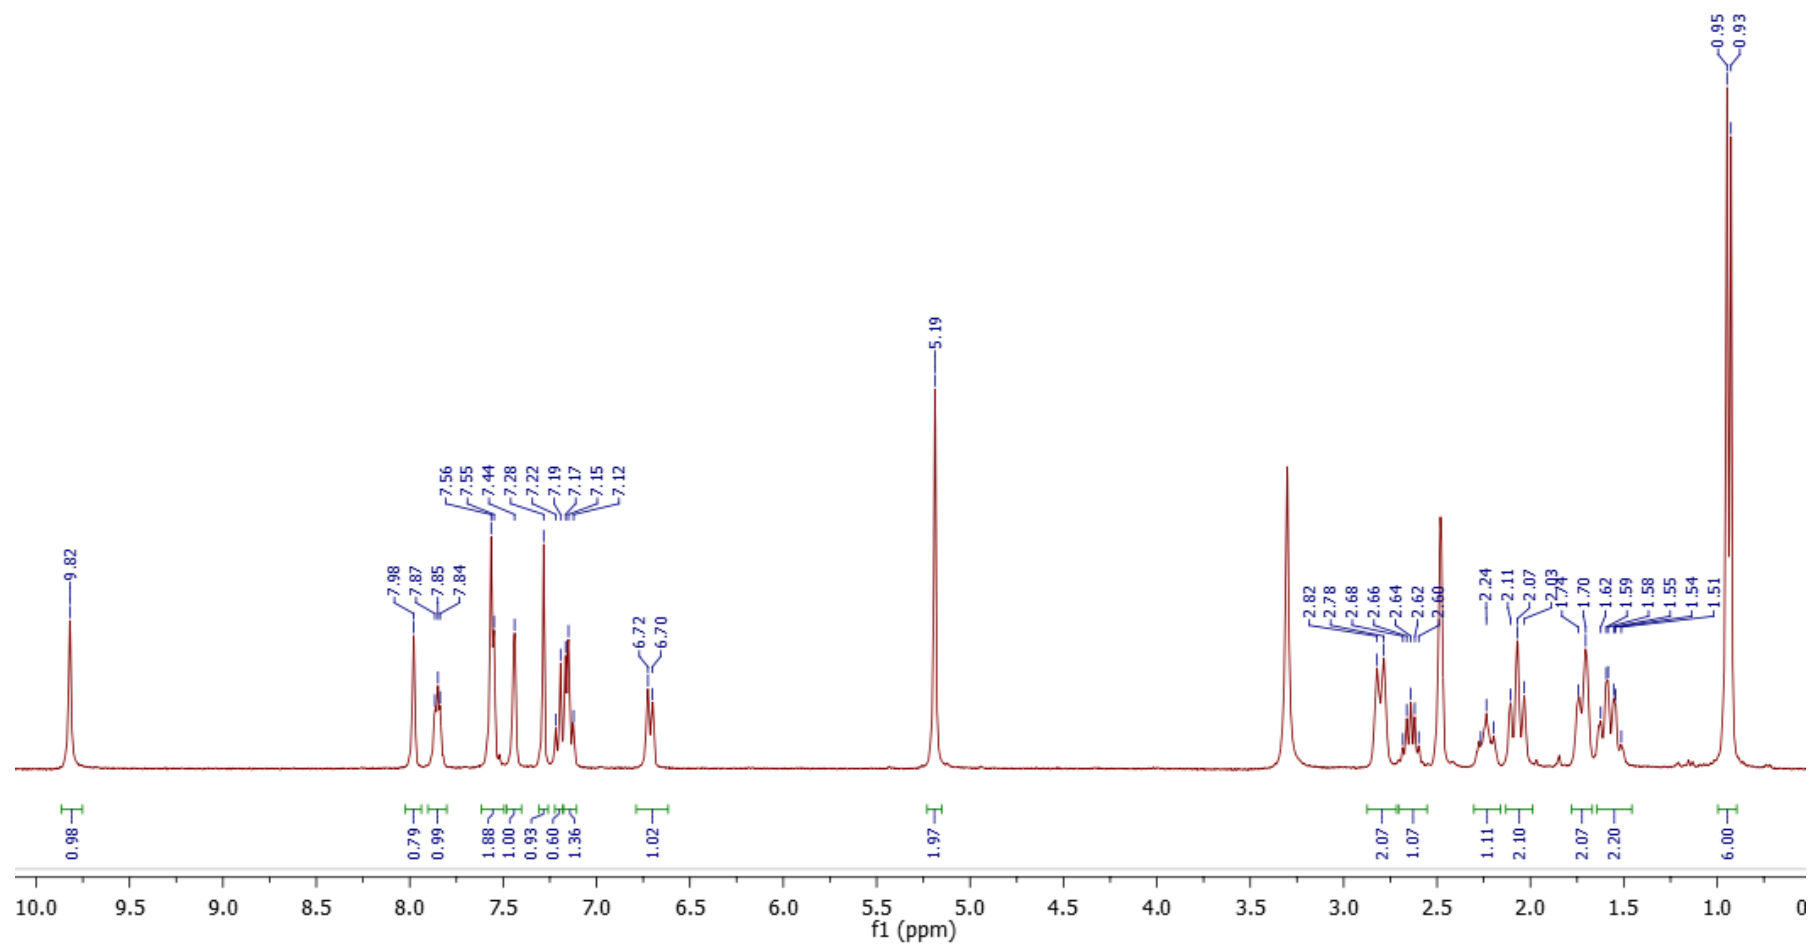

Supplement: s1 [file s1]
